# Supplementary material for: Secular Trends in the Prevalence of Abdominal Obesity Among Chinese Adults With Normal Weight, 1993-2015
Source: Research Square preprint supplement (doi:10.21203/rs.3.rs-127698/v1), 2020-12-23
Supplement: Supplementary file 1 [file 5af349b989aae9e30d6a6025.docx]

Secular trends in the prevalence of abdominal obesity among Chinese adults with normal weight, 1993-2015

Xingxing Sun1,Tingting Du2

1 Department of Anesthesiology, Tongji Hospital, Tongji Medical College of Huazhong University of Science and Technology, Wuhan 430030, PR China.

2 Department of Endocrinology, Tongji Hospital, Tongji Medical College of Huazhong University of Science and Technology, Wuhan 430030, PR China.

†Corresponding author: Tingting Du, MD, PhD, Department of Endocrinology, Tongji Hospital, Tongji Medical College, Huazhong University of Science and Technology, Wuhan, Hubei 430030, China.

Tel and Fax: 86-27-83661425

E-mail: [aduttsxx@163.com](mailto:aduttsxx@163.com)

**Supplementary Table 1 Unadjusted demographic characteristics of Chinese adults aged ≥ 18 years: the CHNS 1993–2015**

|  | 1993  (*n* = 7745) | 1997  (*n* = 8351) | 2000  (*n* = 9331) | 2004  (*n* = 8993) | 2006  (*n* = 8856) | 2009  (*n* = 9338) | 2011  (*n* = 12539) | 2015  (*n* = 11259) |
| --- | --- | --- | --- | --- | --- | --- | --- | --- |
| Women (%) | 52.3 | 51.3 | 52.1 | 52.2 | 52.9 | 52.4 | 53.0 | 51.3 |
| Age (y, Mean ± SD) | 42.8 ± 15.7 | 43.4 ± 15.8 | 44.9 ± 15.5 | 47.9 ± 15.3 | 49.2 ± 15.2 | 50.3 ± 15.3 | 51.1±15.2 | 51.5±14.8 |
